# Supplementary material for: Beyond Edge Injection: Area Effects in Graphene-Metal Contact Resistance
Source: Research Square preprint supplement (doi:10.21203/rs.3.rs-8107234/v1), 2025-12-05
Supplement: Supplementary file 1 [file 9ae009a170e37c6882d0f094.docx]

**[Supplementary Information]**

**Beyond Edge Injection: Area Effects in Graphene-Metal Contact Resistance**

**Junsu Park1, Jong Seok Lee1**

**1**Department of Physics and Photon Science, Gwangju Institute of Science and Technology (GIST), Gwangju 61005, Korea

**Sungbae Lee2***
**2**KENTECH College, Korea Institute of Energy Technology (KENTECH), Naju 58330, Korea

*Corresponding author: [jaylinlee@kentech.ac.kr](mailto:jaylinlee@kentech.ac.kr)


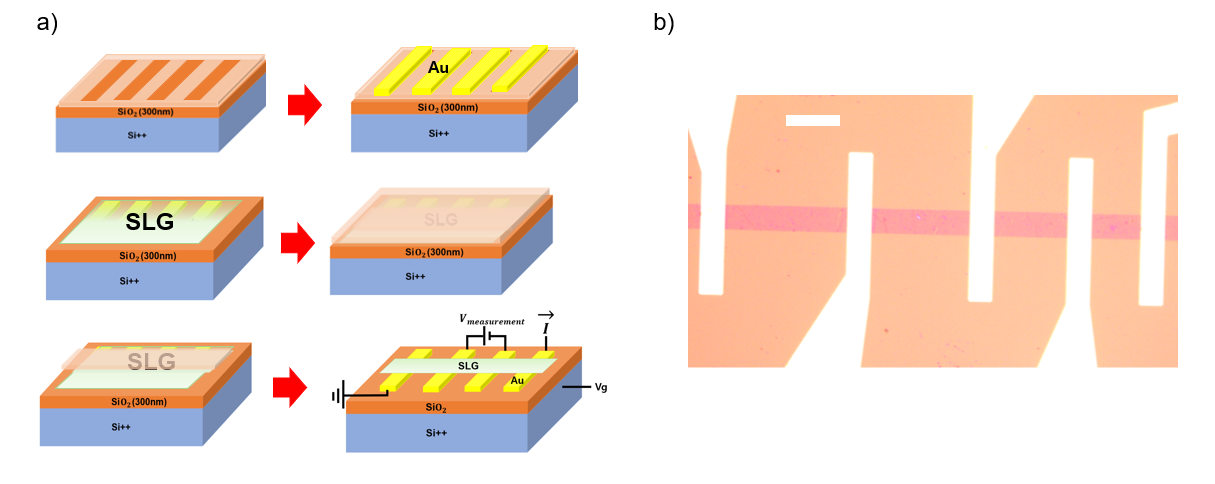


**Figure S1.** (a): Metal-on-bottom fabrication flow for the graphene devices: Ti/Au electrodes patterned on Si++/SiO₂ (300 nm), transfer and patterning of CVD single-layer graphene, and the final measurement layout. (b): optical micrograph of a completed device showing the SLG channel bridging the Au electrodes with the scale bar 40μm.


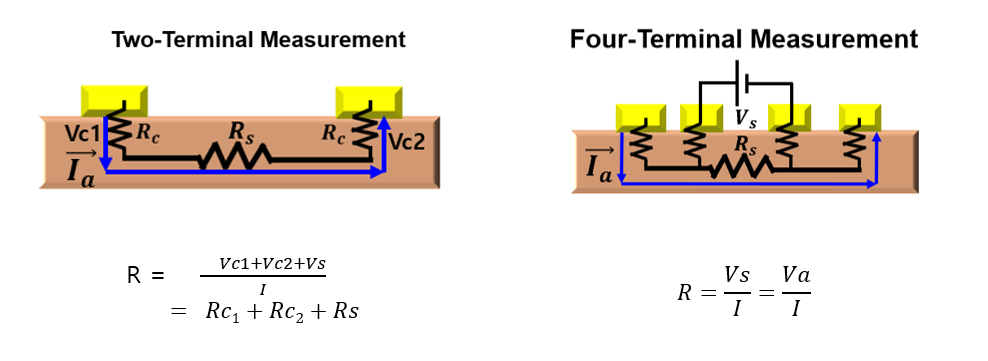


**Figure S2.** Conceptual illustration of two-terminal and four-terminal measurement configurations. The two-terminal setup includes both channel and contact resistances in the measured value, while the four-terminal configuration isolates only the intrinsic channel resistance by eliminating contact effects


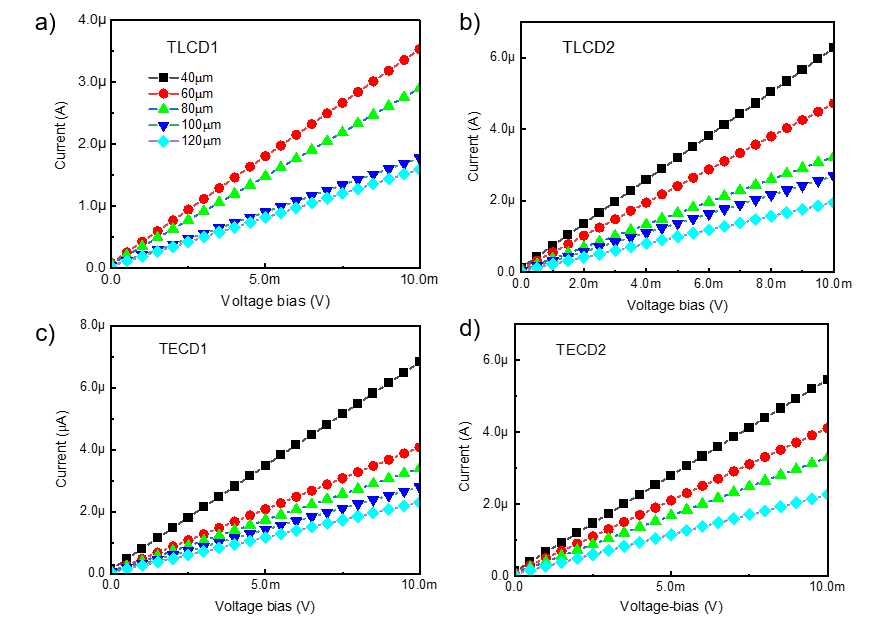


**Figure S3.** Two-probe current–voltage (*I*–*V*) characteristics of TLCD and TECD devices with various channel lengths, confirming linear Ohmic behavior and enabling extraction of total resistance for TLM analysis.


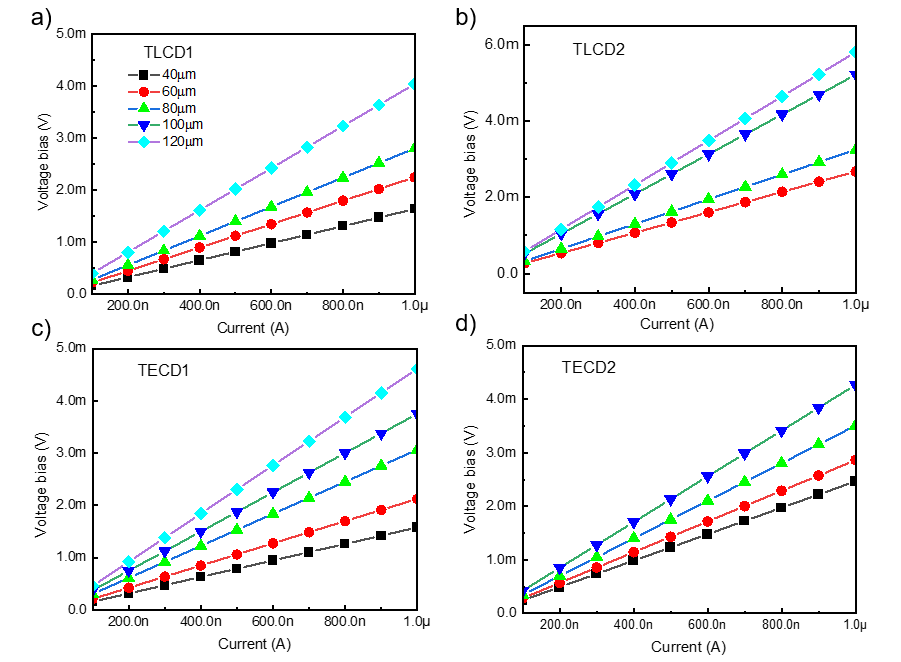


**Figure S4**. Four-probe *V*–*I* characteristics of TLCD and TECD devices with various channel lengths. The four-terminal configuration measures the intrinsic channel response, allowing accurate extraction of contact resistance through the exclusion of contact effects.


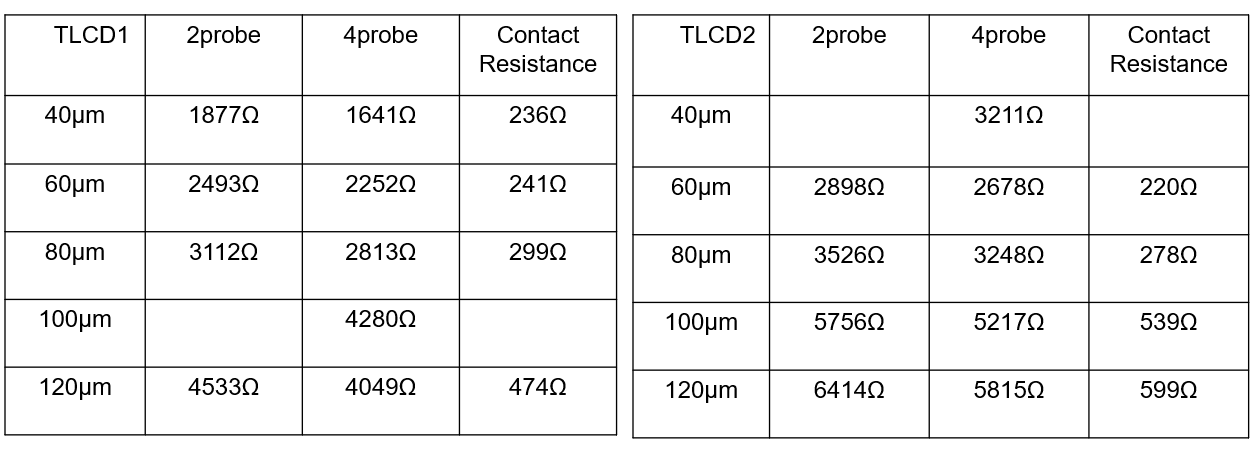


**Table S1**. Summary of two-probe and four-probe resistance values for TLCD devices with different channel lengths. The contact resistance was obtained from the difference between two-probe and four-probe measurements.


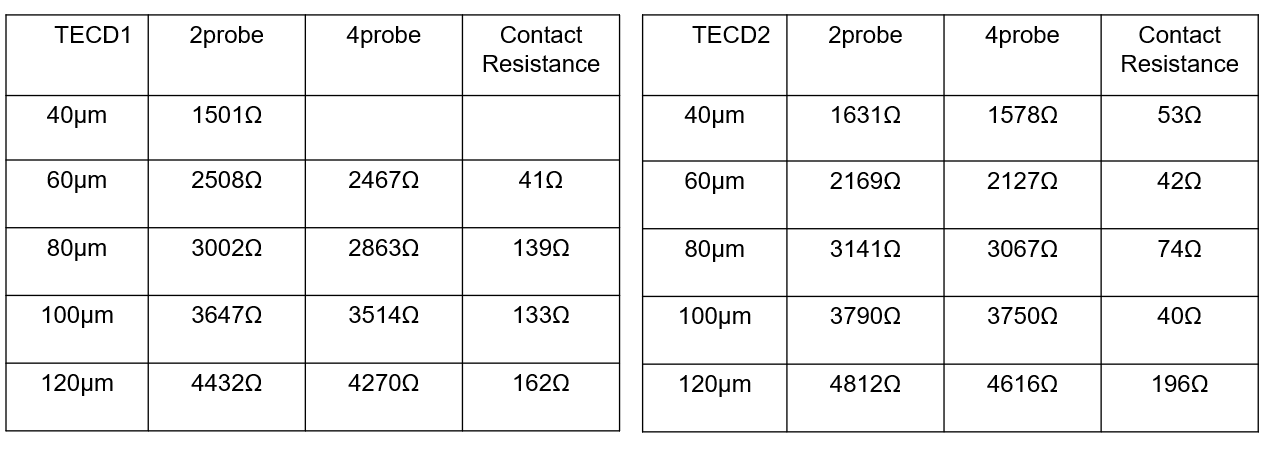


**Table S2.** Two-probe and four-probe resistance values for TECD devices with various channel lengths. The extracted contact resistance shows significantly lower values.


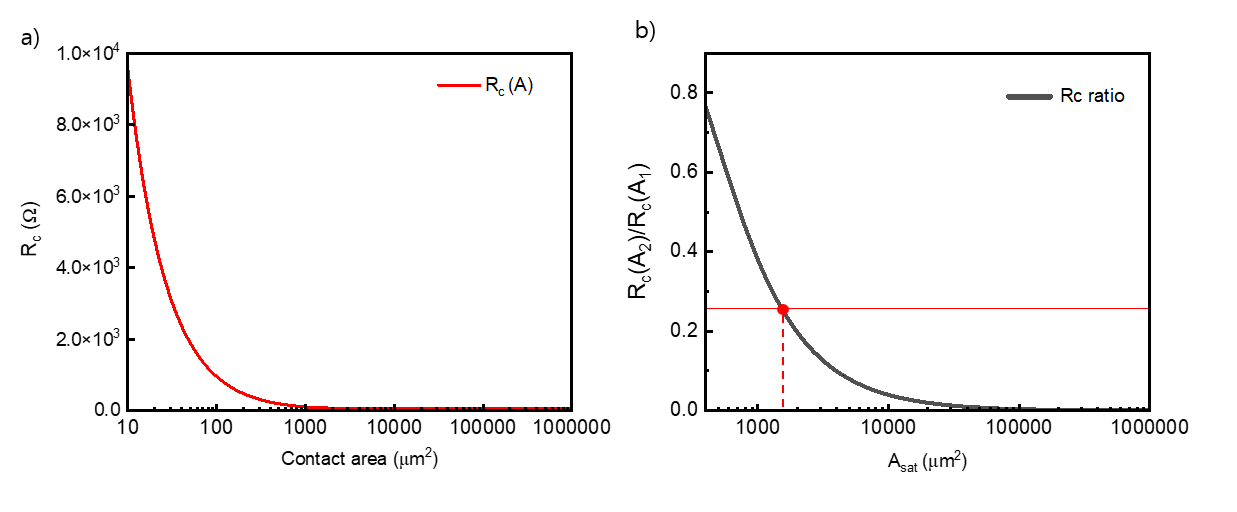


**Figure S5**. Simulated relationship; and between contact resistance and contact area showing a rapid decrease followed by saturation as the contact area increases. The point in (b) represents the saturated contact area *A*sat, where the calculated ratio, reaches the experimentally observed value, indicating that further increase in contact area no longer significantly reduces the contact resistance.
